# Supplementary material
Source: Springer Nature journal article supplement (https://www.springermedizin.de/resource/supplementary/12885_2010_2308_MOESM2_ESM.pdf/9460986)

Growth Rate

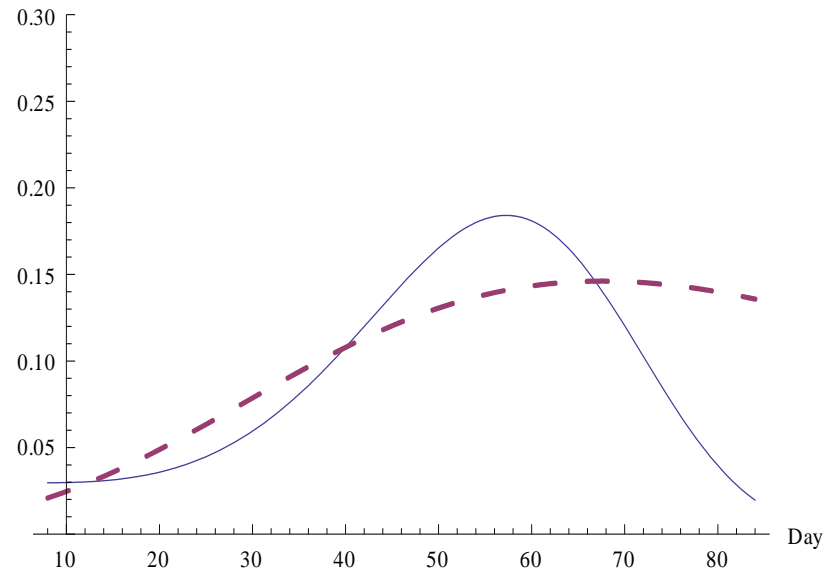

Supplement: MOESM2 [file 9460986]
